# Supplementary material for: Survival benefit and toxicity profile of adjuvant icotinib for patients with EGFR mutation-positive non-small cell lung carcinoma: a retrospective study
Source: PubMed Central journal article supplement — Transl Lung Cancer Res. 2020 Dec;9(6):2401–10. doi: 10.21037/tlcr-20-1214 (PMC7815377; doi:10.21037/tlcr-20-1214), 2020-12
Supplement: tlcr-09-06-2401-supplementary.pdf [file tlcr-09-06-2401-supplementary.pdf]

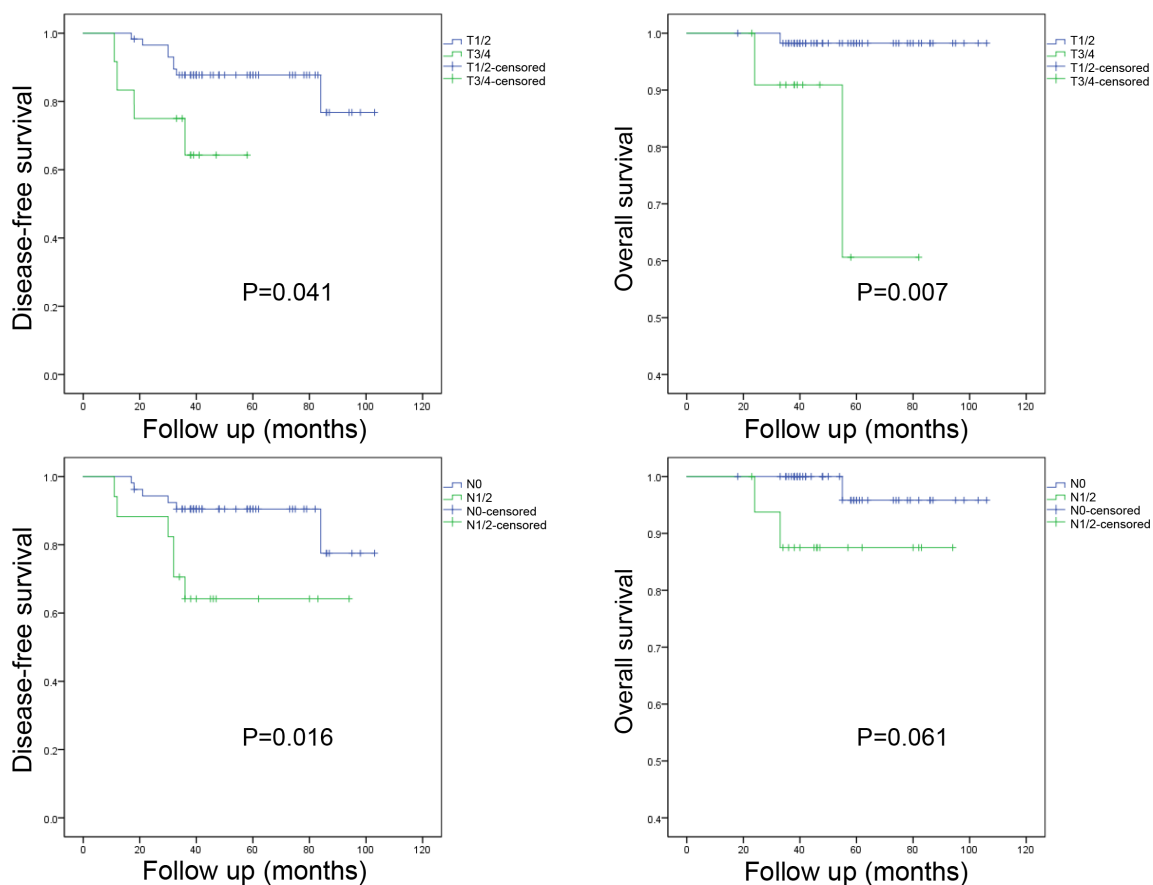

**Figure S1** Kaplan-Meier curves for the subgroup analyses in patients receiving adjuvant icotinib. Subgroup DFS (A) and OS (B) curves with T stage (T1/2 *vs.* T3/4); and subgroup DFS (C) and OS (D) curves with N stage (N0 *vs.* N1/2). DFS, disease-free survival; OS, overall survival.
